# Supplementary material for: Rapid preparation and characterization of a bridged bis(β-cyclodextrin) functionalized urea–formaldehyde monolithic column by a “one-pot” approach
Source: Royal Society of Chemistry journal article supplement (doi:10.1039/d1py00906k), 2021-01-01
Supplement: d1py00906k1.pdf [file d1py00906k1.pdf]

## Supplementary Information

### **Rapid preparation and characterization of a bridged bis( $\beta$ -cyclodextrin) functionalized urea-formaldehyde monolithic column by “one-pot” approach**

Liu Yue<sup>a</sup>, Zhiping Su<sup>a</sup>, Shuangcheng Jiang<sup>c</sup>, Haoran Sun<sup>a</sup>, Haixia Lyu<sup>a\*</sup>, Zenghong Xie<sup>b\*</sup>

<sup>a</sup>*College of Materials Science and Engineering, Fuzhou University, Fuzhou, 350108, China*

<sup>b</sup>*College of Chemistry, Fuzhou University, Fuzhou, 350108, China*

<sup>c</sup>*Fisheries Research Institute of Fujian, Fujian Xiamen, 361013, China*

\*Corresponding author: Haixia Lyu

Tel: +86-591-22866131

E-mail: [hx\\_lv@163.com](mailto:hx_lv@163.com)

\*Corresponding author: Zenghong Xie

Tel: +86-591-22866159

E-mail: [zhxie@fzu.edu.cn](mailto:zhxie@fzu.edu.cn)

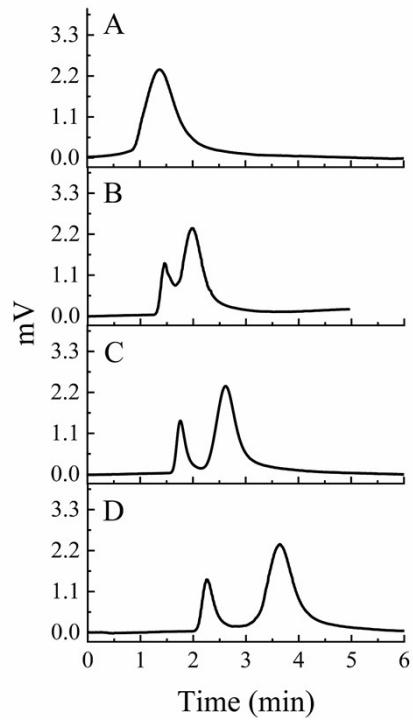

**Fig. S1** Separation of RS-(±)-1-4-Met on different columns (A): urea/formaldehyde: 500/500; (B): urea/formaldehyde: 450/550; (C): urea/formaldehyde: 400/600; (D): urea/formaldehyde: 350/650; Experimental conditions: mobile phase: 10 mM ammonium formate, pH 3.5, H<sub>2</sub>O/ACN = 10/90, applied voltage: -5 kV; pump flow rate: 0.1 mL min<sup>-1</sup>; applied pressure: 1000 psi; detection wave: 214 nm.

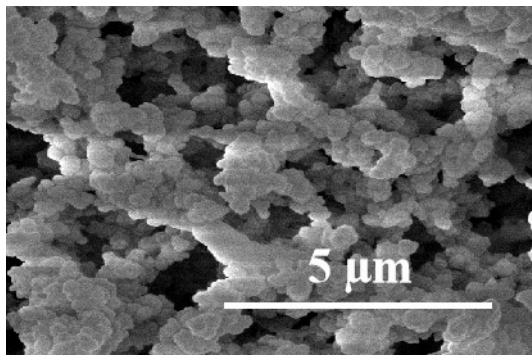

(A)

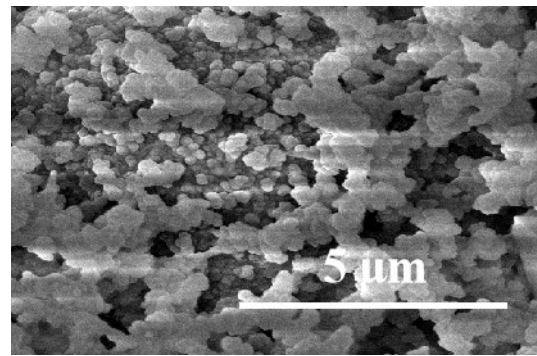

(B)

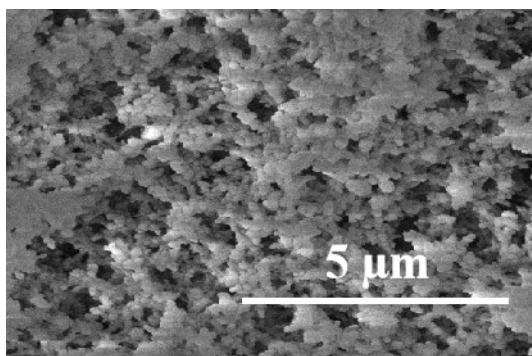

(C)

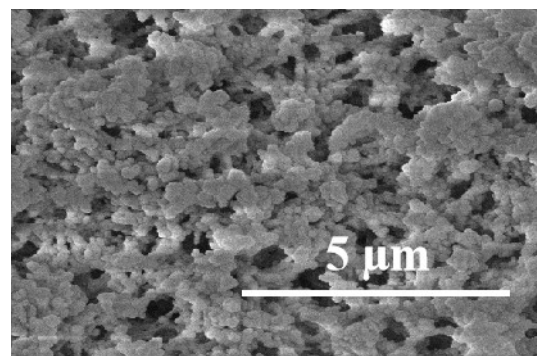

(D)

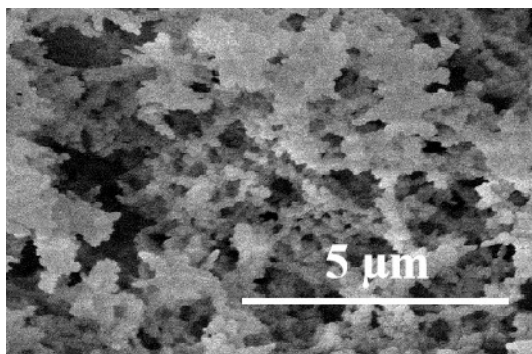

(E)

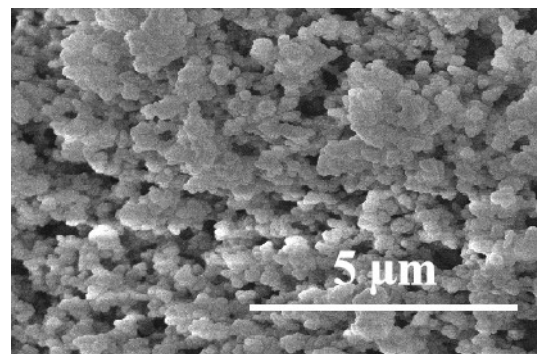

(F)

**Fig. S2** SEMs of DAA-bridged monoliths with different composition

A-D: The ratio of urea/formaldehyde were 500:500, 450:550, 400:600 and 350:650, respectively.

C, E, F: The total quality of DAA and  $\beta$ -CD were 15.56, 7.79 and 22.93 mg, respectively.

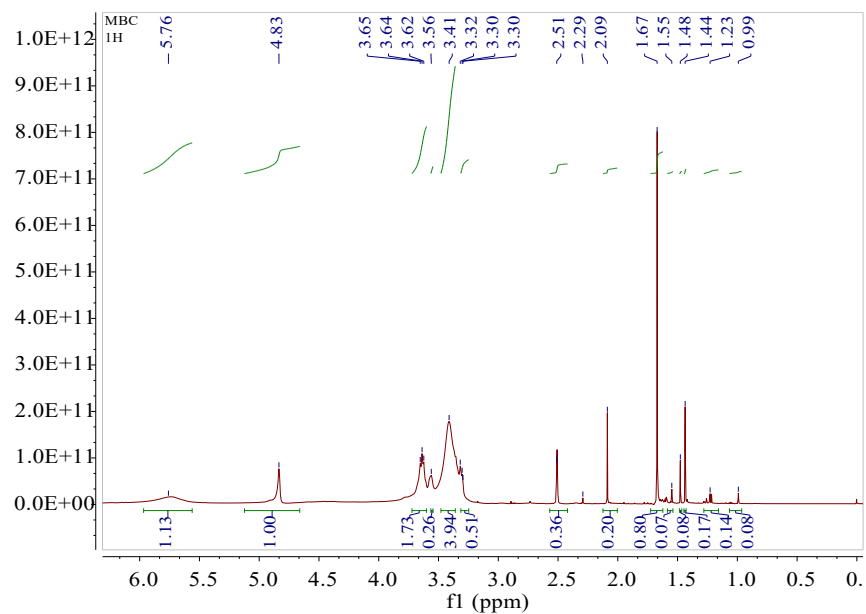

(A)

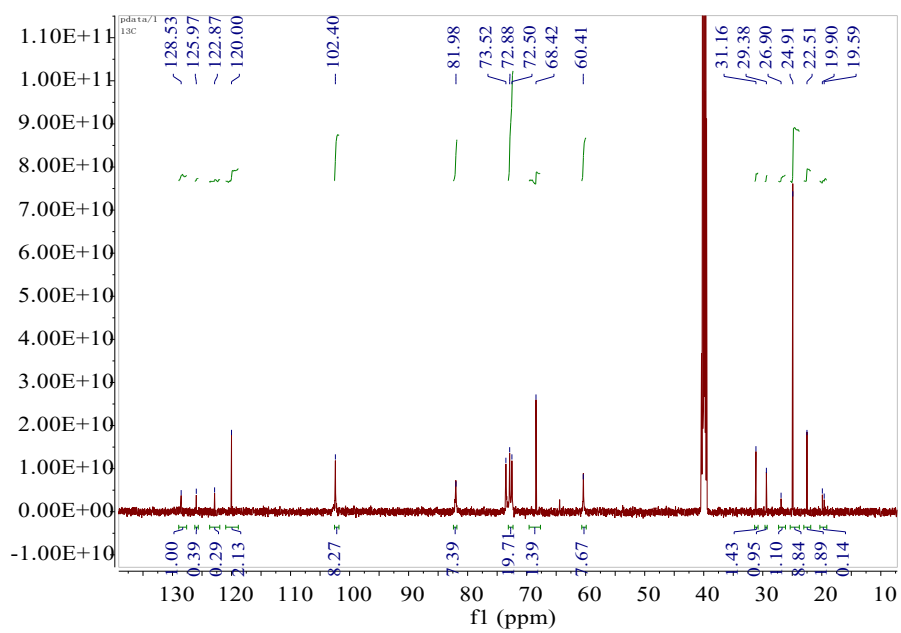

(B)

**Fig. S3** NMR of MBA-bridged-CD monolith (A:  $^1\text{H}$  NMR, B:  $^{13}\text{C}$  NMR)

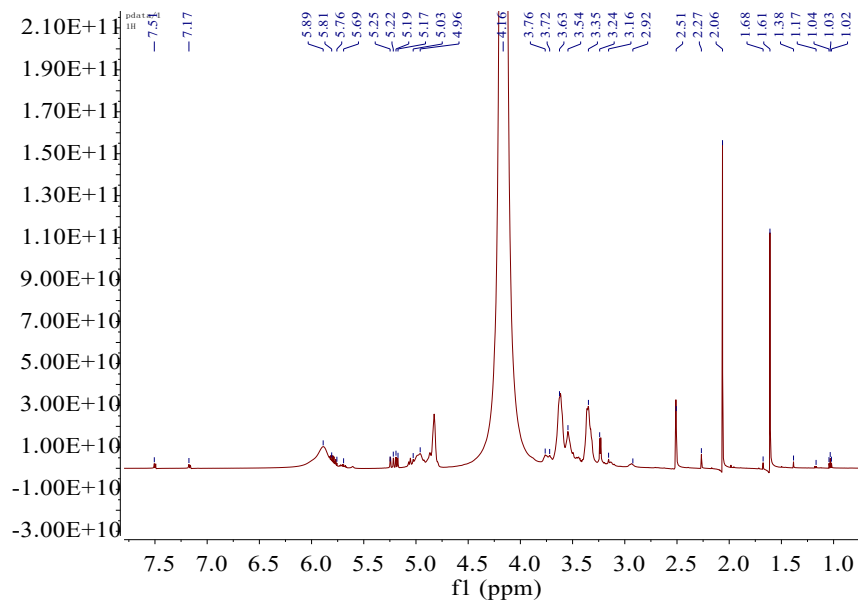

(A)

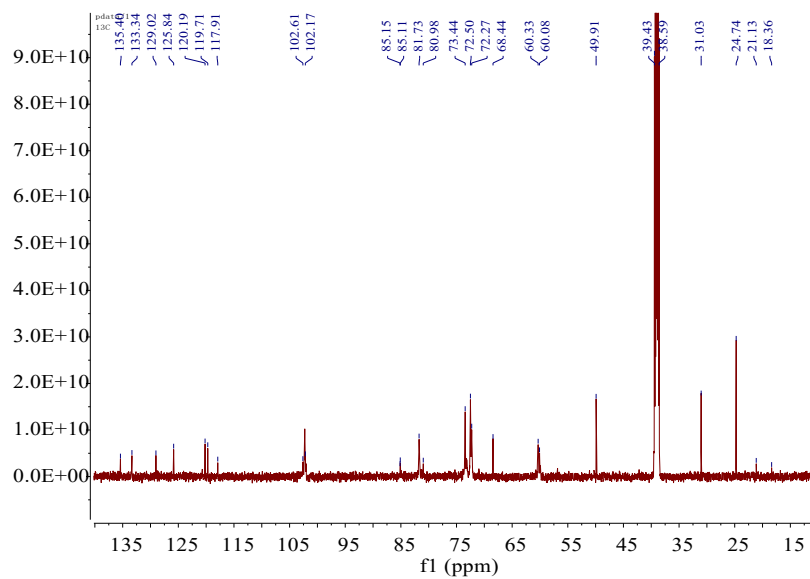

(B)

**Fig. S4** NMR of DAA-bridged-CD monolith (A:  $^1\text{H}$  NMR, B:  $^{13}\text{C}$  NMR)

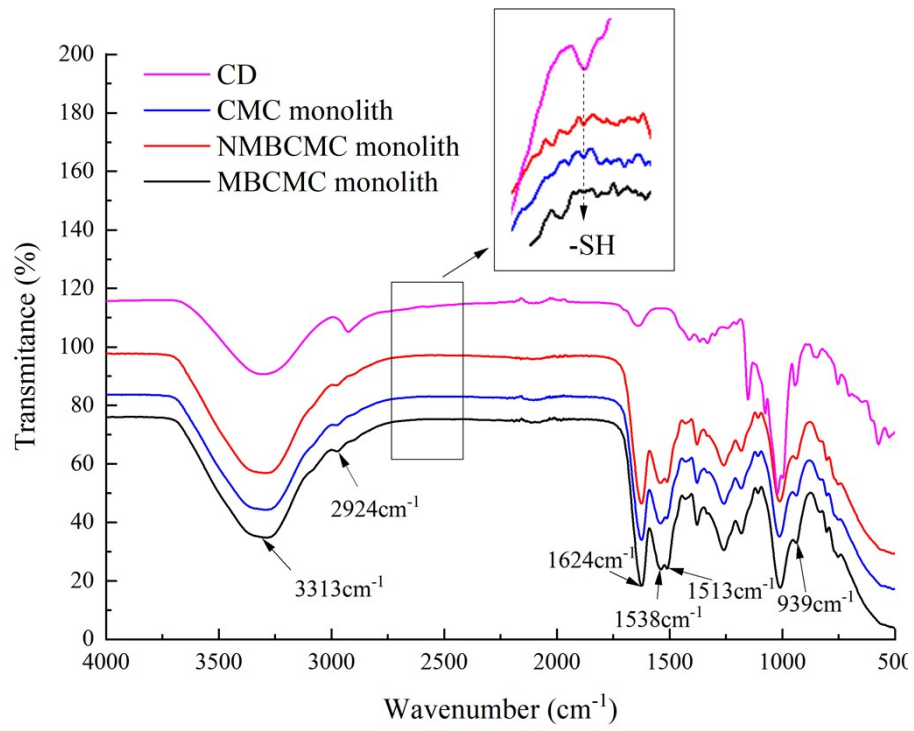

**Fig. S5** FT-IR of monoliths and SH- $\beta$ -CD

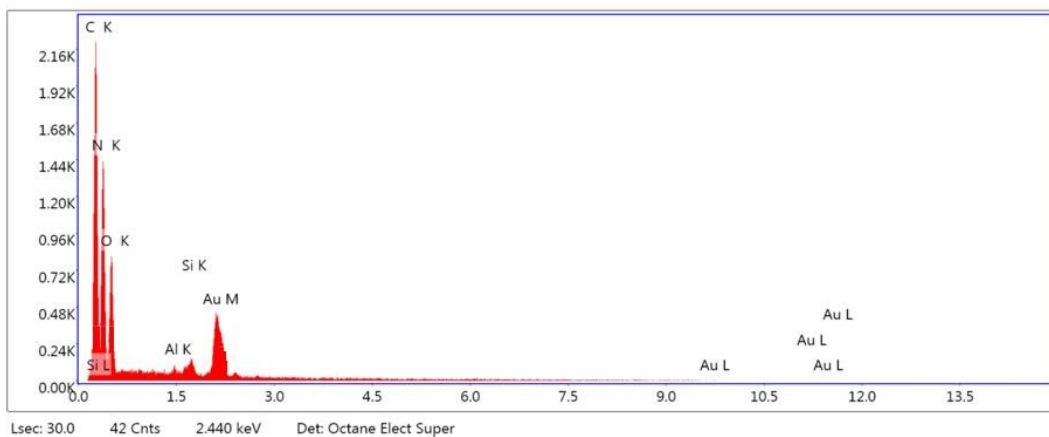

(A) urea-formaldehyde matrix

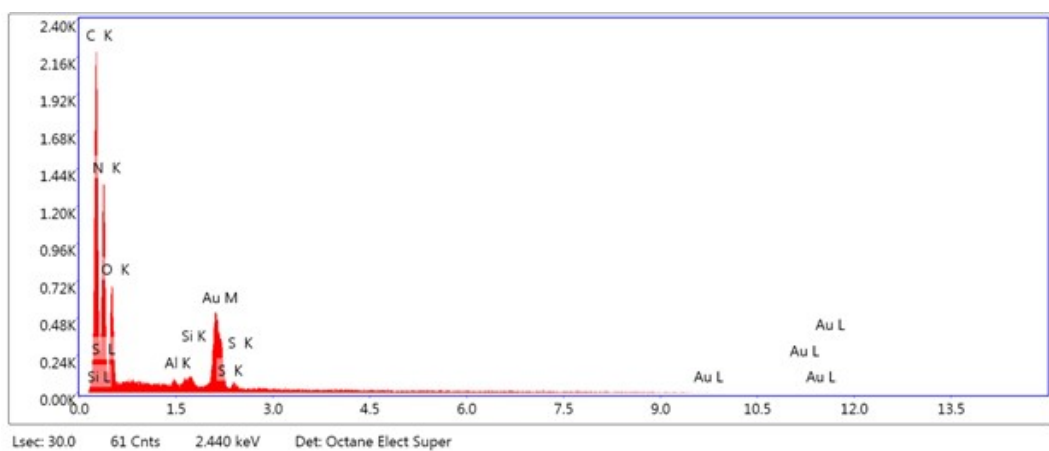

(B) MBA-bridged-CD-monolith

**Fig. S6** EDS of different monoliths

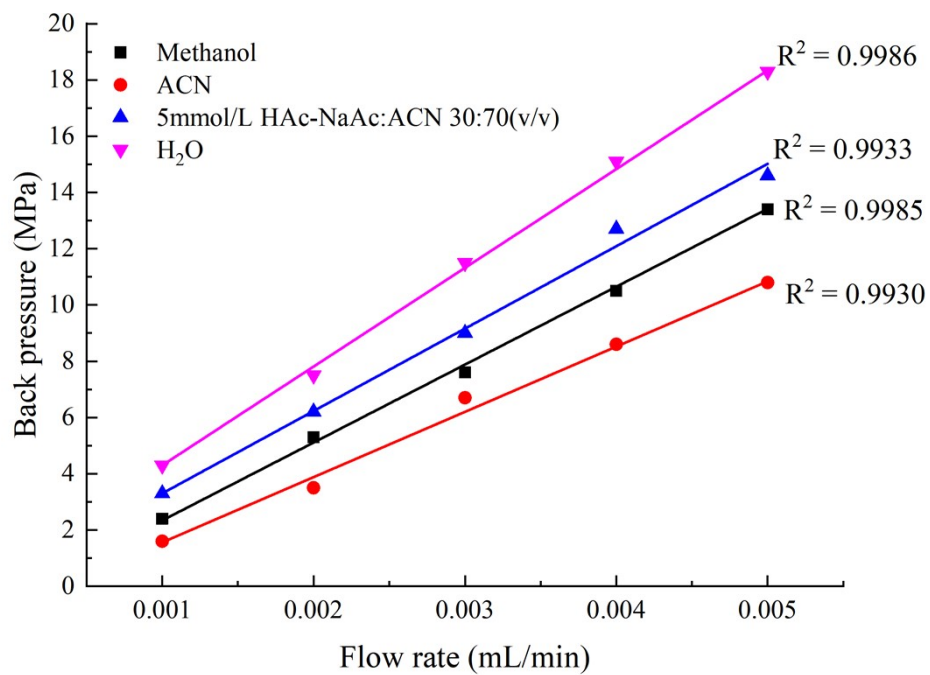

**Fig. S7** Influence of flow rate on the back pressure of MBA-bridged-CD-monolith



**Table S1** Preparation of monolith with different composition

| Column | Reaction solution              |                   |          |                      |                                  | Back pressure (MPa) | Permeability ( $\times 10^{-14} \text{ m}^2$ ) |
|--------|--------------------------------|-------------------|----------|----------------------|----------------------------------|---------------------|------------------------------------------------|
|        | 1 g mL <sup>-1</sup> Urea (mg) | Formaldehyde (mg) | DAA (mg) | SH- $\beta$ -CD (mg) | 0.1 mol L <sup>-1</sup> HCl (mg) |                     |                                                |
| A      | 500                            | 500               | 0.63     | 14.93                | 100                              | ~0.3                | ~96.25                                         |
| B      | 450                            | 550               | 0.63     | 14.93                | 100                              | ~5.5                | ~5.25                                          |
| C      | 400                            | 600               | 0.63     | 14.93                | 100                              | ~14.4               | ~2.01                                          |
| D      | 350                            | 650               | 0.63     | 14.93                | 100                              | ~20.1               | ~1.44                                          |
| E      | 400                            | 600               | 0.32     | 7.47                 | 100                              | ~5.3                | ~5.45                                          |
| F      | 400                            | 600               | 0.95     | 21.98                | 100                              | ~17.5               | ~1.65                                          |
